# Supplementary material for: The Loss of SMAD4/DPC4 Expression Associated with a Strongly Activated Hedgehog Signaling Pathway Predicts Poor Prognosis in Resected Pancreatic Cancer
Source: PubMed Central journal article supplement (PMC6692626; doi:10.7150/jca.30883), 2019-07-10

## Supplementary tables and figures

Table S1. Patient and tumor characteristics

| <b>Characteristics</b>       | <b>N (%). Patients</b> |
|------------------------------|------------------------|
| <b>Age, y [mean (SD)]</b>    | 61 (39-83)             |
| <b>Gender</b>                |                        |
| <b>Male</b>                  | 132 (55.7)             |
| <b>Female</b>                | 105 (44.3)             |
| <b>Serum CA19-9</b>          |                        |
| <b>~37 U/mL</b>              | 99 (41.8)              |
| <b>&gt;37 U/mL</b>           | 138 (58.2)             |
| <b>Location</b>              |                        |
| <b>Head</b>                  | 99 (41.8)              |
| <b>Body and tail</b>         | 126 (53.2)             |
| <b>Other</b>                 | 12 (5.0)               |
| <b>Size, mm [mean (SD)]</b>  | 42 (1-97)              |
| <b>Lymph node metastasis</b> |                        |
| <b>Negative</b>              | 129 (54.4)             |
| <b>Positive</b>              | 108 (45.6)             |
| <b>Venous invasion</b>       |                        |
| <b>Negative</b>              | 195 (82.3)             |
| <b>Positive</b>              | 42 (17.7)              |
| <b>Perineural invasion</b>   |                        |
| <b>Negative</b>              | 45 (19.0)              |
| <b>Positive</b>              | 192 (81.0)             |
| <b>Histologic grading</b>    |                        |
| <b>Well -Moderate</b>        | 165 (69.6)             |
| <b>Poor</b>                  | 72 (30.4)              |
| <b>UICC T</b>                |                        |
| <b>T1</b>                    | 33 (13.9)              |
| <b>T2</b>                    | 97 (40.9)              |
| <b>T3</b>                    | 89 (37.6)              |
| <b>T4</b>                    | 18 (8.0)               |
| <b>UICC N</b>                |                        |
| <b>N0</b>                    | 129 (54.4)             |
| <b>N1</b>                    | 75 (31.6)              |
| <b>N2</b>                    | 33 (13.9)              |
| <b>UICC stage</b>            |                        |
| <b>I</b>                     | 81 (34.2)              |
| <b>II</b>                    | 105 (44.3)             |
| <b>III</b>                   | 51 (21.5)              |

Data are expressed as percentages unless otherwise stated

SD: standard deviation.

Table S2. Immunohistochemistry of common driven genes and Shh protein expression

| <b>Variables</b>              | <b>N (%). Patients</b> |
|-------------------------------|------------------------|
| <b>Driver gene</b>            |                        |
| <b>Smad4</b>                  |                        |
| <b>Lost</b>                   | 168 (70.9)             |
| <b>Intact</b>                 | 69 (29.1)              |
| <b>p53</b>                    |                        |
| <b>Normal</b>                 | 90 (38.0)              |
| <b>Abnormal</b>               | 147 (62.0)             |
| <b>P16</b>                    |                        |
| <b>Lost</b>                   | 177 (74.7)             |
| <b>Intact</b>                 | 60 (25.3)              |
| <b>Kras</b>                   |                        |
|                               | 237 (100.0)            |
| <b>Sonic hedgehog pathway</b> |                        |
| <b>Shh</b>                    |                        |
| <b>Low</b>                    | 135 (57.0)             |
| <b>High</b>                   | 102 (43.0)             |
| <b>Gli1</b>                   |                        |
| <b>Low</b>                    | 123 (51.9)             |
| <b>High</b>                   | 114 (48.1)             |
| <b>Gli2</b>                   |                        |
| <b>Low</b>                    | 102 (43.0)             |
| <b>High</b>                   | 135 (57.0)             |
| <b>SMO</b>                    |                        |
| <b>Low</b>                    | 90 (38.0)              |
| <b>High</b>                   | 147 (62.0)             |

SMO: smoothened; Gli: glioma-associated oncogene homolog.

Table S3. Relationship between Smad4, Gli1 and SMO protein expression and clinicopathologic characteristics using  $\chi^2$  test

| Characteristics              | Smad4 immunoreactivity |      |                | Gli1 immunoreactivity |      |                | SMO immunoreactivity |      |                |
|------------------------------|------------------------|------|----------------|-----------------------|------|----------------|----------------------|------|----------------|
|                              | Intact                 | Lost | <i>p</i> value | Low                   | High | <i>p</i> value | Low                  | High | <i>p</i> value |
| <b>Age, y</b>                |                        |      | 0.421          |                       |      | 0.100          |                      |      | 0.250          |
| ~60                          | 36                     | 78   |                | 69                    | 45   |                | 39                   | 75   |                |
| >60                          | 33                     | 90   |                | 54                    | 69   |                | 51                   | 72   |                |
| <b>Gender</b>                |                        |      | 0.015*         |                       |      | 0.897          |                      |      | 0.001*         |
| Male                         | 30                     | 102  |                | 69                    | 63   |                | 63                   | 69   |                |
| Female                       | 39                     | 66   |                | 54                    | 51   |                | 27                   | 78   |                |
| <b>Serum CA19-9</b>          |                        |      | 0.003*         |                       |      | 0.490          |                      |      | 0.329          |
| ~37 U/ml                     | 39                     | 60   |                | 54                    | 45   |                | 34                   | 65   |                |
| >37 U/ml                     | 30                     | 108  |                | 69                    | 69   |                | 56                   | 82   |                |
| <b>Location</b>              |                        |      | 0.000*         |                       |      | 0.006*         |                      |      | 0.115          |
| Head                         | 42                     | 57   |                | 63                    | 36   |                | 30                   | 69   |                |
| Body and tail                | 24                     | 102  |                | 57                    | 69   |                | 51                   | 75   |                |
| Other                        | 3                      | 9    | NA             | 3                     | 9    | NA             | 9                    | 3    | NA             |
| <b>Largest Size</b>          |                        |      | 0.028*         |                       |      | 0.054          |                      |      | 0.171          |
| ~2 cm                        | 16                     | 20   |                | 24                    | 12   |                | 10                   | 26   |                |
| >2 cm                        | 53                     | 148  |                | 99                    | 102  |                | 80                   | 121  |                |
| <b>Lymph node metastasis</b> |                        |      | 0.655          |                       |      | 0.187          |                      |      | 0.178          |
| Negative                     | 36                     | 93   |                | 72                    | 57   |                | 54                   | 75   |                |
| Positive                     | 33                     | 75   |                | 51                    | 57   |                | 36                   | 72   |                |
| <b>Venous invasion</b>       |                        |      | 0.227          |                       |      | 0.196          |                      |      | 0.739          |
| Negative                     | 60                     | 135  |                | 105                   | 90   |                | 75                   | 120  |                |
| Positive                     | 9                      | 33   |                | 18                    | 24   |                | 15                   | 27   |                |
| <b>Perineural invasion</b>   |                        |      | 0.489          |                       |      | 0.227          |                      |      | 0.476          |
| Negative                     | 15                     | 30   |                | 27                    | 18   |                | 15                   | 30   |                |
| Positive                     | 54                     | 138  |                | 96                    | 96   |                | 75                   | 117  |                |
| <b>Histologic grading</b>    |                        |      | 0.064          |                       |      | 0.001*         |                      |      | 0.100          |
| Well                         | 54                     | 111  |                | 99                    | 66   |                | 57                   | 108  |                |
| -Moderate                    |                        |      |                |                       |      |                |                      |      |                |
| Poor                         | 15                     | 57   |                | 24                    | 48   |                | 33                   | 39   |                |
| <b>UICC T</b>                |                        |      | 0.040*         |                       |      | 0.026*         |                      |      | 0.921          |
| T1+2                         | 45                     | 85   |                | 76                    | 54   |                | 49                   | 81   |                |
| T3+4                         | 24                     | 83   |                | 47                    | 60   |                | 41                   | 66   |                |
| <b>UICC N</b>                |                        |      | 0.614          |                       |      | 0.252          |                      |      | 0.001*         |
| N0                           | 36                     | 93   |                | 72                    | 57   |                | 54                   | 75   |                |
| N1                           | 21                     | 54   |                | 33                    | 42   |                | 36                   | 39   |                |
| N2                           | 12                     | 21   |                | 18                    | 15   |                | 0                    | 33   |                |
| <b>UICC Stage</b>            |                        |      | 0.569          |                       |      | 0.162          |                      |      | 0.003*         |
| I                            | 26                     | 55   |                | 49                    | 32   |                | 35                   | 46   |                |
| II                           | 31                     | 74   |                | 50                    | 55   |                | 46                   | 59   |                |
| III                          | 12                     | 39   |                | 24                    | 27   |                | 9                    | 42   |                |

\*,  $p < 0.05$ ; UICC: International Union against Cancer. SMO: smoothed; Gli: glioma-associated oncogene homolog; NA: non-adoption.

Table S4. Relation between Smsd4 and Sonic Hedgehog Pathway Using  $\chi^2$  Test

| Variable    | Smad4 Immunoreactivity |          | <i>p</i> value | Pearson's R |
|-------------|------------------------|----------|----------------|-------------|
|             | Intact (n)             | Loss (n) |                |             |
| <b>Shh</b>  |                        |          | 0.000          | 0.343       |
| <b>Low</b>  | 21                     | 114      |                |             |
| <b>High</b> | 48                     | 54       |                |             |
| <b>Gli1</b> |                        |          | 0.000          | 0.505       |
| <b>Low</b>  | 63                     | 60       |                |             |
| <b>High</b> | 6                      | 108      |                |             |
| <b>Gli2</b> |                        |          | 0.340          |             |
| <b>Low</b>  | 33                     | 69       |                |             |
| <b>High</b> | 36                     | 99       |                |             |
| <b>SMO</b>  |                        |          | 0.516          |             |
| <b>Low</b>  | 24                     | 66       |                |             |
| <b>High</b> | 45                     | 102      |                |             |

SMO: smoothened; Gli: glioma-associated oncogene homolog.

Table S5. Multivariate Cox Regression for Survival Analysis Using the Combination of The Status of *SMAD4* and the SHH Pathway

| Variables                    |                       | RFS                 |                | OS                  |                |
|------------------------------|-----------------------|---------------------|----------------|---------------------|----------------|
|                              |                       | HR (95% CI)         | <i>p</i> value | HR (95% CI)         | <i>p</i> value |
| <b>Gender</b>                | <b>Female</b>         | 1                   | 0.000*         | 1                   | 0.000*         |
|                              | <b>Male</b>           | 2.436 (1.793–3.309) |                | 2.296 (1.689–3.122) |                |
| <b>Serum CA19–9</b>          | <b>~37 U/ml</b>       | 1                   | 0.000*         | 1                   | 0.000*         |
|                              | <b>&gt;37 U/ml</b>    | 2.854 (1.967–4.141) |                | 3.312 (2.318–4.732) |                |
| <b>Location</b>              | <b>Head</b>           | 1                   | 0.000*         | 1                   | 0.000*         |
|                              | <b>Body and Tail</b>  | 2.101 (1.551–2.846) |                | 2.044 (1.516–2.756) |                |
| <b>Largest tumor size</b>    | <b>~ 2 cm</b>         | NA                  |                | NS                  | 0.327          |
|                              | <b>&gt; 2 cm</b>      |                     |                |                     |                |
| <b>Lymph node metastasis</b> | <b>Negative</b>       | NA                  |                | 1                   | 0.005*         |
|                              | <b>Positive</b>       |                     |                | 1.521(1.138–2.032)  |                |
| <b>Venous invasion</b>       | <b>Negative</b>       | NS                  | 0.692          | 1                   | 0.002*         |
|                              | <b>Positive</b>       |                     |                | 1.869 (1.218–2.851) |                |
| <b>Histologic grading</b>    | <b>Well -Moderate</b> | NS                  | 0.985          | NS                  | 0.800          |
|                              | <b>Poor</b>           |                     |                |                     |                |
| <b>TP53</b>                  | <b>Normal</b>         | NA                  |                | NS                  | 0.088          |
|                              | <b>Abnormal</b>       |                     |                |                     |                |
| <b>Group</b>                 | <b>I</b>              | 1                   | 0.000*         | 1                   | 0.000*         |
|                              | <b>II</b>             | 1.813 (1.172–2.806) | 0.008*         | 1.864 (1.218–2.851) | 0.004*         |
|                              | <b>III</b>            | 2.853 (1.755–4.639) | 0.000*         | 3.309 (2.035–5.382) | 0.000*         |

OS: overall survival; RFS: recurrence-free survival; HR: hazard ratio; CI: confidence interval; NS: non-significant; NA: non-adoption.

Table S6. Comparison of the Prognostic Accuracies of *SMAD4*, Activated SHH Pathway and the Combined Model

| <b>Model</b>                              | <b>OS</b> |      |      |                | <b>RFS</b> |      |      |                |
|-------------------------------------------|-----------|------|------|----------------|------------|------|------|----------------|
|                                           | C-Index   | AIC  | BIC  | <i>p</i> value | C-Index    | AIC  | BIC  | <i>p</i> value |
| <b><i>SMAD4</i></b>                       | 0.5862    | 2052 | 2056 | 0.000          | 0.5830     | 1927 | 1930 | 0.000          |
| <b>Activated SHH Pathway</b>              | 0.5684    | 2045 | 2049 | 0.000          | 0.5548     | 1922 | 1926 | 0.000          |
| <b><i>SMAD4</i>+activated SHH Pathway</b> | 0.6220    | 2033 | 2037 | 0.000          | 0.6076     | 1914 | 1918 | 0.000          |

Table S7. Antibodies

| <b>Antibodies</b>                                     | <b>Company</b>           | <b>Dilution</b> |
|-------------------------------------------------------|--------------------------|-----------------|
| <b>Rabbit anti-Kras polyclonal antibody ab180772</b>  | Abcam                    | 1:100           |
| <b>Rabbit anti-p16 monoclonal antibody ab108349</b>   | Abcam                    | 1:50            |
| <b>Rabbit anti-p53 polyclonal antibody ab31333</b>    | Abcam                    | 1:50            |
| <b>Mouse anti-Smad4 monoclonal antibody sc-7966 B</b> | Santa Cruz Biotechnology | 1:200           |
| <b>Rabbit anti-Shh polyclonal antibody sc-9024</b>    | Santa Cruz Biotechnology | 1:100           |
| <b>Rabbit anti-Gli1 polyclonal antibody #43926</b>    | SAB                      | 1:100           |
| <b>Rabbit anti-SMO polyclonal antibody 20787-1-AP</b> | Proteintech              | 1:100           |
| <b>Mouse anti-Gli2 monoclonal antibody sc-271786</b>  | Santa Cruz Biotechnology | 1:200           |

Table S8. Relation between other driver genes and Sonic Hedgehog Pathway Using  $\chi^2$  Test

|             | <i>TP53</i> |        | <i>p</i> value | <i>P16</i> |        | <i>p</i> value |
|-------------|-------------|--------|----------------|------------|--------|----------------|
|             | Abnormal    | Normal |                | Lost       | Intact |                |
| <b>Shh</b>  |             |        | 0.090          |            |        | 0.079          |
| <b>Low</b>  | 90          | 45     |                | 95         | 40     |                |
| <b>High</b> | 57          | 45     |                | 82         | 20     |                |
| <b>Gli1</b> |             |        | 0.647          |            |        | 0.797          |
| <b>Low</b>  | 78          | 45     |                | 91         | 32     |                |
| <b>High</b> | 69          | 45     |                | 86         | 28     |                |
| <b>Gli2</b> |             |        | 0.018          |            |        | 0.582          |
| <b>Low</b>  | 72          | 30     |                | 78         | 24     |                |
| <b>High</b> | 75          | 60     |                | 99         | 36     |                |
| <b>SMO</b>  |             |        | 0.615          |            |        | 0.194          |
| <b>Low</b>  | 54          | 36     |                | 63         | 27     |                |
| <b>High</b> | 93          | 54     |                | 114        | 33     |                |

SMO: smoothened; Gli: glioma-associated oncogene homolog.



**Fig. S1 Immunohistochemical Labeling of Driver Genes**

**A1)** Smad4 were scored as intact (positive), indicating the presence of an intact gene, **A2)** Smad4 were scored as lost (negative), indicating a deletion or inactivating mutation of the gene had occurred. **bB)** Immunohistochemical labeling of Kras was all scored as intact (positive), indicating the presence of an intact gene. **C1)** Pancreatic ductal adenocarcinoma (PDAC) showing a “normal” pattern of p53 immunohistochemical labeling. **C2)** Example of PDAC with diffusely positive nuclear labeling for p53, namely robust nuclear accumulation of immunolabeled protein in  $\geq 30\%$  of neoplastic cells compared with adjacent normal cells. **C3)** Example of PDAC with loss of nuclear labeling for p53, namely a virtual absence of immunolabeling compared with adjacent normal tissue (immunolabeling in  $< 5\%$  of neoplastic cells), suggesting the presence of an intragenic deletion, nonsense or frameshift mutation. **D1)** Positive p16 immunolabeling indicating an intact CDKN2A/p16 gene. **D2)** Negative p16 immunolabeling indicating alteration of the CDKN2A/p16 gene.

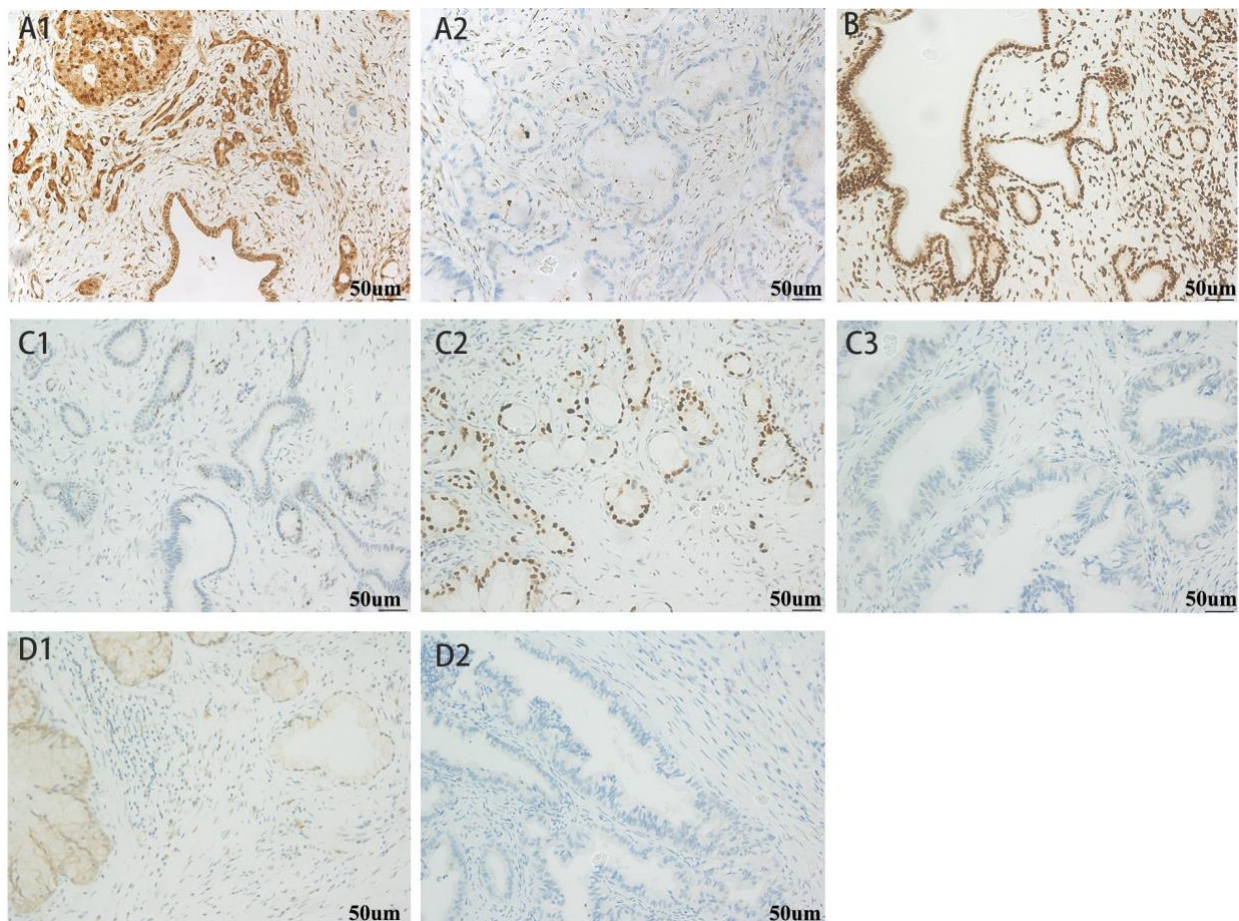

**Fig. S2** Immunohistochemical Labeling of Shh and Gli2 Expression in Pancreatic Cancer

Shh: **A1**) weak expression, **A2**) moderate expression, and **A3**) intense expression in tumor cells. Gli2: **B1**) weak expression, **B2**) moderate expression, and **B3**) intense expression in tumor cells and stroma. All magnification = 400×. Positive staining appears brown.

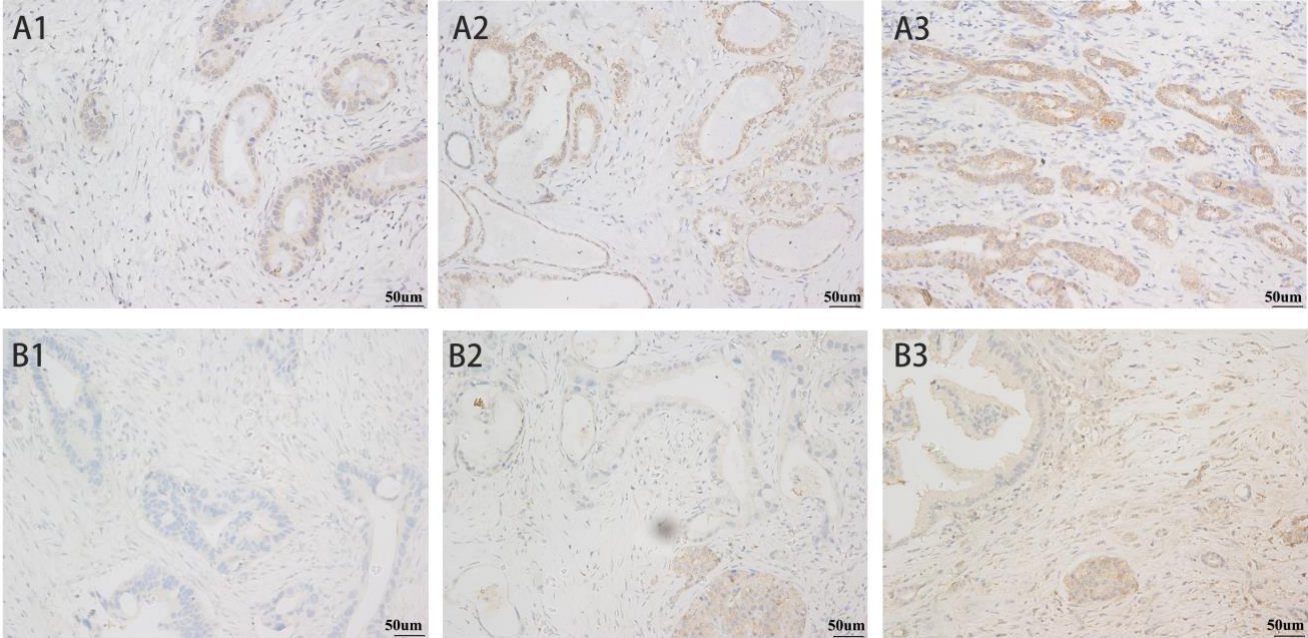

Supplement: jcav10p4123s1.pdf [file jcav10p4123s1.pdf]
